# Supplementary material
Source: MDPI journal article supplement (https://www.mdpi.com/2075-4701/11/4/599)
Supplement: s1 [file s1]

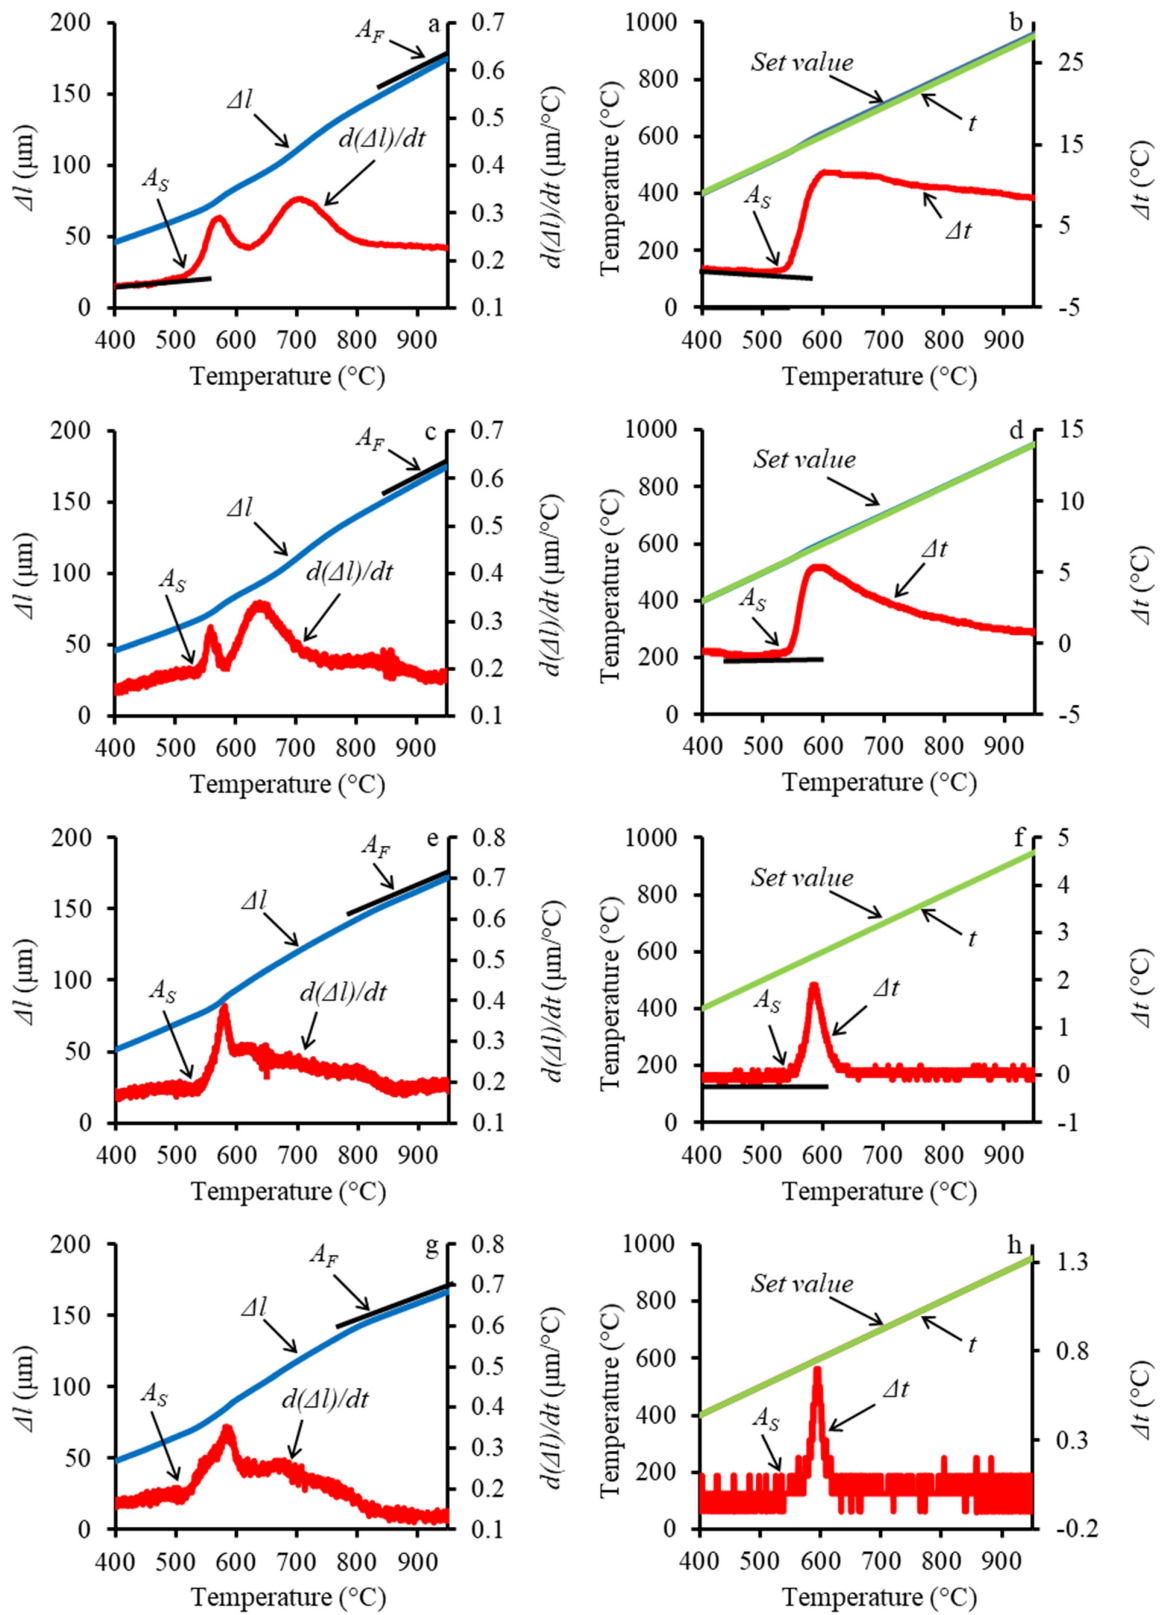

**Figure S1.** The results of dilatometric measurements at a heating rate of (a, b) 90, (c, d) 10, (e, f) 0.6, and (g, h) 0.15  $^\circ\text{C}/\text{s}$  of as-processed program steel: a, c, e, g - dilatogram ( $\Delta l$ ) and the first derivative ( $d(\Delta l)/dt$ ); b, d, f, h – set value of temperature (Set value), the real temperature of a specimen ( $t$ ), the difference between the set value of temperature and real temperature of a specimen ( $\Delta t$ ).
